# Supplementary material
Source: PubMed Central journal article supplement (PMC4909621)
Supplement: aasm.39.7.1389s1.pdf [file aasm.39.7.1389s1.pdf]

**Table S1A.** Impact of treatment in NT1 patients.

|                                                       | NoTreatment NT1 |        | Treatment NT1 |        |          |
|-------------------------------------------------------|-----------------|--------|---------------|--------|----------|
| %                                                     | 27.6            |        | 72.4          |        |          |
| Variable                                              | Mean            | SD     | Mean          | SD     | M-W test |
| Activities                                            | 32.88           | 11.12  | 35.89         | 8.12   | 0.41     |
| Social                                                | 41.25           | 4.95   | 41.21         | 8.15   | 0.87     |
| School                                                | 46.38           | 5.66   | 47.81         | 5.51   | 0.66     |
| Anxious/Depressed                                     | 63.50           | 8.50   | 59.67         | 9.32   | 0.17     |
| Withdrawn/Depressed                                   | 64.63           | 9.18   | 64.81         | 9.97   | 0.84     |
| Somatic Complaints                                    | 65.75           | 5.90   | 63.48         | 7.89   | 0.26     |
| Social Problems                                       | 60.25           | 6.86   | 58.33         | 10.01  | 0.23     |
| Thought Problems                                      | 65.13           | 10.51  | 65.00         | 7.96   | 0.94     |
| Attention Problems                                    | 62.88           | 5.89   | 57.67         | 8.13   | 0.05     |
| Rule-Breaking Behavior                                | 57.50           | 8.16   | 53.19         | 4.17   | 0.21     |
| Aggressive Behavior                                   | 61.50           | 5.63   | 58.29         | 8.67   | 0.11     |
| Internalizing Problems                                | 67.00           | 7.84   | 63.90         | 9.36   | 0.32     |
| Externalizing Problems                                | 60.50           | 6.80   | 55.14         | 8.20   | 0.12     |
| Total Problems                                        | 65.63           | 6.91   | 59.95         | 9.18   | 0.13     |
| Affective Disorder                                    | 74.00           | 7.24   | 68.95         | 7.32   | 0.19     |
| Anxiety Disorder                                      | 64.50           | 9.22   | 59.60         | 7.51   | 0.22     |
| Somatic Disorder                                      | 58.67           | 5.43   | 60.25         | 9.86   | 0.93     |
| Attention Deficit/Hyperactivity Disorder              | 58.83           | 4.67   | 54.15         | 5.00   | 0.05     |
| Oppositional Defiant Disorder                         | 56.33           | 4.55   | 57.50         | 6.39   | 0.85     |
| Conduct Disorder                                      | 57.67           | 7.89   | 53.95         | 5.70   | 0.20     |
| Physical Functioning Parent Proxy Report              | 600.00          | 241.87 | 591.67        | 194.22 | 0.84     |
| Emotional Functioning Parent Proxy Report             | 329.17          | 115.56 | 336.11        | 124.62 | 0.97     |
| Social Functioning Parent Proxy Report                | 433.33          | 60.55  | 415.28        | 79.12  | 0.73     |
| School Functioning Parent Proxy Report                | 250.00          | 121.45 | 322.22        | 100.33 | 0.19     |
| Physical Health Summary Score Parent Proxy Report     | 75.00           | 30.23  | 73.96         | 24.28  | 0.81     |
| Psychosocial Health Summary Score Parent Proxy Report | 67.77           | 16.18  | 71.01         | 17.06  | 0.69     |
| Physical Functioning Self Report                      | 620.83          | 180.57 | 622.22        | 101.78 | 0.59     |
| Emotional Functioning Self Report                     | 291.67          | 116.90 | 350.00        | 91.56  | 0.35     |
| Social Functioning Self Report                        | 412.50          | 72.02  | 434.72        | 61.92  | 0.42     |
| School Functioning Self Report                        | 241.67          | 103.28 | 344.44        | 76.00  | 0.05     |
| Physical Health Summary Score Self Report             | 77.50           | 22.50  | 77.60         | 12.55  | 0.55     |
| Psychosocial Health Summary Score Self Report         | 63.06           | 14.04  | 74.91         | 11.41  | 0.09     |

**Table S1B.** Impact of treatment in NT1 patients: Sodium Oxybate.

|                                                       | No Sodium Oxybate |        | Sodium Oxybate |        |          |
|-------------------------------------------------------|-------------------|--------|----------------|--------|----------|
| %                                                     | 72.4              |        | 27.6           |        |          |
| Variable                                              | Mean              | SD     | Mean           | SD     | M-W test |
| Activities                                            | 33.89             | 9.24   | 37.63          | 8.33   | 0.25     |
| Social                                                | 40.16             | 5.58   | 43.75          | 10.24  | 0.27     |
| School                                                | 47.38             | 5.18   | 47.50          | 6.61   | 1.00     |
| Anxious/Depressed                                     | 61.86             | 9.46   | 57.75          | 7.94   | 0.23     |
| Withdrawn/Depressed                                   | 65.10             | 9.59   | 63.88          | 10.23  | 0.92     |
| Somatic Complaints                                    | 65.10             | 7.31   | 61.50          | 7.31   | 0.18     |
| Social Problems                                       | 59.76             | 10.04  | 56.50          | 6.28   | 0.52     |
| Thought Problems                                      | 65.81             | 9.19   | 63.00          | 6.59   | 0.35     |
| Attention Problems                                    | 61.00             | 7.84   | 54.13          | 5.59   | 0.03     |
| Rule-Breaking Behavior                                | 54.57             | 6.01   | 53.88          | 5.28   | 0.94     |
| Aggressive Behavior                                   | 60.29             | 8.31   | 56.25          | 6.63   | 0.20     |
| Internalizing Problems                                | 66.00             | 9.09   | 61.50          | 8.18   | 0.35     |
| Externalizing Problems                                | 57.81             | 7.80   | 53.50          | 8.54   | 0.23     |
| Total Problems                                        | 63.14             | 8.74   | 57.25          | 8.26   | 0.16     |
| Affective Disorder                                    | 70.89             | 7.77   | 68.13          | 6.77   | 0.38     |
| Anxiety Disorder                                      | 61.39             | 7.96   | 59.25          | 8.48   | 0.39     |
| Somatic Disorder                                      | 60.28             | 9.45   | 59.00          | 8.26   | 0.76     |
| Attention Deficit/Hyperactivity Disorder              | 56.67             | 5.38   | 52.00          | 3.21   | 0.02     |
| Oppositional Defiant Disorder                         | 57.39             | 5.83   | 56.88          | 6.62   | 0.73     |
| Conduct Disorder                                      | 55.56             | 6.90   | 53.13          | 4.64   | 0.57     |
| Physical Functioning Parent Proxy Report              | 571.88            | 241.16 | 637.50         | 74.40  | 0.54     |
| Emotional Functioning Parent Proxy Report             | 320.31            | 123.56 | 362.50         | 114.95 | 0.48     |
| Social Functioning Parent Proxy Report                | 414.06            | 84.64  | 431.25         | 49.55  | 0.88     |
| School Functioning Parent Proxy Report                | 268.75            | 105.87 | 375.00         | 75.59  | 0.02     |
| Physical Health Summary Score Parent Proxy Report     | 71.48             | 30.14  | 79.69          | 9.30   | 0.52     |
| Psychosocial Health Summary Score Parent Proxy Report | 66.34             | 17.44  | 77.92          | 12.14  | 0.16     |
| Physical Functioning Self Report                      | 635.94            | 123.82 | 593.75         | 119.34 | 0.31     |
| Emotional Functioning Self Report                     | 320.31            | 90.47  | 365.63         | 114.90 | 0.39     |
| Social Functioning Self Report                        | 429.69            | 67.22  | 428.13         | 60.41  | 0.93     |
| School Functioning Self Report                        | 298.44            | 99.36  | 359.38         | 66.73  | 0.16     |
| Physical Health Summary Score Self Report             | 79.26             | 15.31  | 74.22          | 14.92  | 0.30     |
| Psychosocial Health Summary Score Self Report         | 69.69             | 12.19  | 76.46          | 13.93  | 0.24     |

**Table S1C.** Impact of treatment in NT1 patients: Modafinil.

|                                                       | No Modafinil |        | Modafinil |        |          |
|-------------------------------------------------------|--------------|--------|-----------|--------|----------|
| %                                                     | 31.0         |        | 69.0      |        |          |
| Variable                                              | Mean         | SD     | Mean      | SD     | M-W test |
| Activities                                            | 33.22        | 10.45  | 35.89     | 8.35   | 0.52     |
| Social                                                | 42.22        | 5.47   | 40.72     | 8.09   | 0.47     |
| School                                                | 47.22        | 5.87   | 47.50     | 5.46   | 0.98     |
| Anxious/Depressed                                     | 62.44        | 8.56   | 59.95     | 9.47   | 0.30     |
| Withdrawn/Depressed                                   | 63.00        | 9.87   | 65.55     | 9.62   | 0.67     |
| Somatic Complaints                                    | 64.89        | 6.09   | 63.75     | 7.99   | 0.48     |
| Social Problems                                       | 59.11        | 7.27   | 58.75     | 10.08  | 0.57     |
| Thought Problems                                      | 64.44        | 10.04  | 65.30     | 8.04   | 0.79     |
| Attention Problems                                    | 61.56        | 6.78   | 58.00     | 8.19   | 0.15     |
| Rule-Breaking Behavior                                | 56.78        | 7.93   | 53.30     | 4.24   | 0.27     |
| Aggressive Behavior                                   | 60.33        | 6.32   | 58.65     | 8.73   | 0.29     |
| Internalizing Problems                                | 65.33        | 8.87   | 64.50     | 9.19   | 0.70     |
| Externalizing Problems                                | 59.11        | 7.61   | 55.50     | 8.24   | 0.28     |
| Total Problems                                        | 63.78        | 8.51   | 60.50     | 9.06   | 0.37     |
| Affective Disorder                                    | 72.14        | 8.23   | 69.35     | 7.27   | 0.49     |
| Anxiety Disorder                                      | 63.57        | 8.77   | 59.68     | 7.70   | 0.26     |
| Somatic Disorder                                      | 58.29        | 5.06   | 60.47     | 10.08  | 0.93     |
| Attention Deficit/Hyperactivity Disorder              | 57.57        | 5.41   | 54.37     | 5.04   | 0.19     |
| Oppositional Defiant Disorder                         | 55.57        | 4.61   | 57.84     | 6.38   | 0.41     |
| Conduct Disorder                                      | 56.71        | 7.63   | 54.11     | 5.81   | 0.24     |
| Physical Functioning Parent Proxy Report              | 614.29       | 224.01 | 585.29    | 198.25 | 0.68     |
| Emotional Functioning Parent Proxy Report             | 346.43       | 114.95 | 329.41    | 125.07 | 0.68     |
| Social Functioning Parent Proxy Report                | 442.86       | 60.75  | 410.29    | 78.59  | 0.32     |
| School Functioning Parent Proxy Report                | 264.29       | 117.13 | 320.59    | 103.17 | 0.29     |
| Physical Health Summary Score Parent Proxy Report     | 76.79        | 28.00  | 73.16     | 24.78  | 0.65     |
| Psychosocial Health Summary Score Parent Proxy Report | 70.47        | 16.40  | 70.09     | 17.12  | 0.87     |
| Physical Functioning Self Report                      | 639.29       | 171.91 | 614.71    | 99.63  | 0.26     |
| Emotional Functioning Self Report                     | 321.43       | 132.62 | 341.18    | 86.12  | 0.85     |
| Social Functioning Self Report                        | 425.00       | 73.60  | 430.88    | 61.57  | 0.85     |
| School Functioning Self Report                        | 271.43       | 122.84 | 338.24    | 73.48  | 0.24     |
| Physical Health Summary Score Self Report             | 79.82        | 21.44  | 76.65     | 12.26  | 0.24     |
| Psychosocial Health Summary Score Self Report         | 67.86        | 18.05  | 73.63     | 10.35  | 0.38     |

**Table S1D.** Impact of treatment in NT1 patients: Venlafaxine.

|                                                       | NoVenlafaxine |        | Venlafaxine |       |          |
|-------------------------------------------------------|---------------|--------|-------------|-------|----------|
| %                                                     | 89.7          |        | 6.9         |       |          |
| Variable                                              | Mean          | SD     | Mean        | SD    | M-W test |
| Activities                                            | 35.38         | 9.14   | 27.00       | 0.00  | 0.07     |
| Social                                                | 41.50         | 7.22   | 42.00       | 9.90  | 0.85     |
| School                                                | 47.27         | 5.75   | 50.00       | 0.00  | 0.37     |
| Anxious/Depressed                                     | 59.88         | 9.15   | 66.00       | 5.66  | 0.23     |
| Withdrawn/Depressed                                   | 63.92         | 9.55   | 69.00       | 8.49  | 0.45     |
| Somatic Complaints                                    | 64.19         | 7.61   | 64.50       | 7.78  | 0.86     |
| Social Problems                                       | 58.58         | 9.32   | 58.50       | 10.61 | 0.93     |
| Thought Problems                                      | 64.65         | 8.88   | 66.50       | 3.54  | 0.79     |
| Attention Problems                                    | 59.42         | 8.13   | 55.00       | 5.66  | 0.42     |
| Rule-Breaking Behavior                                | 54.46         | 5.98   | 53.50       | 4.95  | 0.82     |
| Aggressive Behavior                                   | 59.12         | 8.43   | 59.50       | 2.12  | 0.69     |
| Internalizing Problems                                | 64.27         | 9.25   | 68.00       | 5.66  | 0.32     |
| Externalizing Problems                                | 56.54         | 8.52   | 57.00       | 4.24  | 0.75     |
| Total Problems                                        | 61.23         | 9.18   | 63.00       | 8.49  | 0.72     |
| Affective Disorder                                    | 69.46         | 7.44   | 72.50       | 7.78  | 0.53     |
| Anxiety Disorder                                      | 60.09         | 7.84   | 63.00       | 11.31 | 0.48     |
| Somatic Disorder                                      | 59.78         | 9.31   | 61.00       | 9.90  | 0.72     |
| Attention Deficit/Hyperactivity Disorder              | 55.35         | 5.43   | 55.50       | 4.95  | 0.84     |
| Oppositional Defiant Disorder                         | 56.91         | 6.24   | 58.50       | 0.71  | 0.44     |
| Conduct Disorder                                      | 54.96         | 6.59   | 54.00       | 5.66  | 0.92     |
| Physical Functioning Parent Proxy Report              | 606.82        | 193.68 | 225.00      | .     | 0.20     |
| Emotional Functioning Parent Proxy Report             | 345.45        | 118.68 | 175.00      | .     | 0.20     |
| Social Functioning Parent Proxy Report                | 418.18        | 76.45  | 475.00      | .     | 0.44     |
| School Functioning Parent Proxy Report                | 301.14        | 109.24 | 250.00      | .     | 0.54     |
| Physical Health Summary Score Parent Proxy Report     | 75.85         | 24.21  | 28.12       | .     | 0.17     |
| Psychosocial Health Summary Score Parent Proxy Report | 70.60         | 17.18  | 60.00       | .     | 0.36     |
| Physical Functioning Self Report                      | 625.00        | 126.07 | 625.00      | .     | 0.82     |
| Emotional Functioning Self Report                     | 346.59        | 93.95  | 275.00      | .     | 0.29     |
| Social Functioning Self Report                        | 432.95        | 64.27  | 425.00      | .     | 0.76     |
| School Functioning Self Report                        | 320.45        | 97.17  | 300.00      | .     | 0.76     |
| Physical Health Summary Score Self Report             | 77.95         | 15.63  | 78.13       | .     | 0.82     |
| Psychosocial Health Summary Score Self Report         | 73.03         | 12.78  | 66.66       | .     | 0.29     |

**Table S2:** Impact of treatment in IE patients.

|                                          | NoTreatment IE |      | Treatment IE |       |          |
|------------------------------------------|----------------|------|--------------|-------|----------|
| %                                        | 64.1           |      | 35.9         |       |          |
| Variable                                 | Mean           | SD   | Mean         | SD    | M-W test |
| Activities                               | 35.28          | 6.47 | 36.14        | 9.21  | 0.99     |
| Social                                   | 45.40          | 7.52 | 46.14        | 8.37  | 0.55     |
| School                                   | 46.52          | 7.23 | 49.00        | 5.49  | 0.37     |
| Anxious/Depressed                        | 57.04          | 7.36 | 56.86        | 7.70  | 0.95     |
| Withdrawn/Depressed                      | 54.80          | 6.83 | 58.43        | 11.02 | 0.40     |
| Somatic Complaints                       | 57.56          | 5.37 | 58.79        | 9.74  | 0.86     |
| Social Problems                          | 56.60          | 6.76 | 56.71        | 4.05  | 0.43     |
| Thought Problems                         | 55.72          | 6.43 | 54.14        | 3.76  | 1.00     |
| Attention Problems                       | 56.44          | 5.22 | 58.00        | 7.58  | 0.71     |
| Rule-Breaking Behavior                   | 52.68          | 3.60 | 52.43        | 3.01  | 0.88     |
| Aggressive Behavior                      | 56.00          | 6.61 | 54.71        | 4.51  | 0.85     |
| Internalizing Problems                   | 54.52          | 9.77 | 54.86        | 13.98 | 1.00     |
| Externalizing Problems                   | 51.48          | 9.15 | 51.50        | 7.10  | 0.84     |
| Total Problems                           | 54.20          | 8.67 | 54.50        | 9.69  | 0.94     |
| Affective Disorder                       | 57.80          | 5.98 | 58.86        | 9.05  | 1.00     |
| Anxiety Disorder                         | 57.08          | 7.97 | 59.93        | 8.43  | 0.34     |
| Somatic Disorder                         | 56.32          | 6.14 | 58.79        | 9.53  | 0.48     |
| Attention Deficit/Hyperactivity Disorder | 55.64          | 5.84 | 55.50        | 5.87  | 0.77     |
| Oppositional Defiant Disorder            | 56.28          | 7.04 | 54.07        | 4.10  | 0.33     |
| Conduct Disorder                         | 52.88          | 4.03 | 53.36        | 4.52  | 0.74     |
